# Supplementary material
Source: PubMed Central journal article supplement (PMC5396455)
Supplement: NIHMS828975-supplement-2.pdf [file NIHMS828975-supplement-2.pdf]

# Supplemental Information

Original western blots

Fig 2D. Original blots

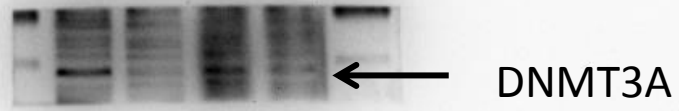

|                 |   |   |     |     |
|-----------------|---|---|-----|-----|
| DMSO            | + | - | -   | -   |
| PEITC( $\mu$ M) | - | 5 | 2.5 | -   |
| 5 AZA( $\mu$ M) | - | - | -   | 2.5 |

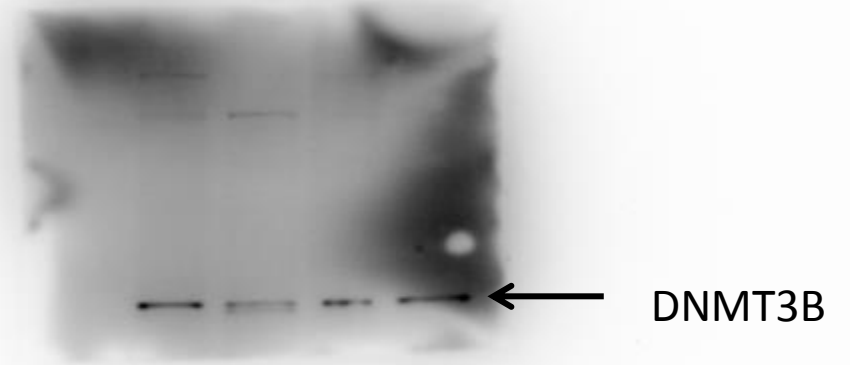

|                 |   |   |     |     |
|-----------------|---|---|-----|-----|
| DMSO            | + | - | -   | -   |
| PEITC( $\mu$ M) | - | 5 | 2.5 | -   |
| 5 AZA( $\mu$ M) | - | - | -   | 2.5 |

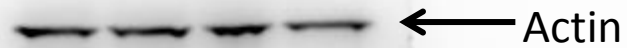

|                 |   |   |     |     |
|-----------------|---|---|-----|-----|
| DMSO            | + | - | -   | -   |
| PEITC( $\mu$ M) | - | 5 | 2.5 | -   |
| 5 AZA( $\mu$ M) | - | - | -   | 2.5 |

Fig 3A. Original blots

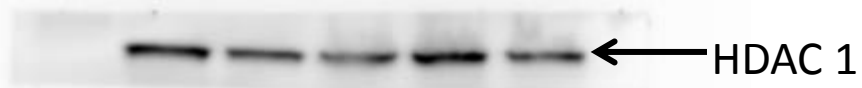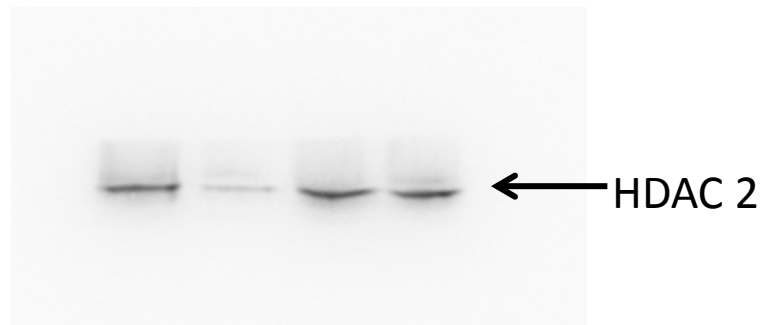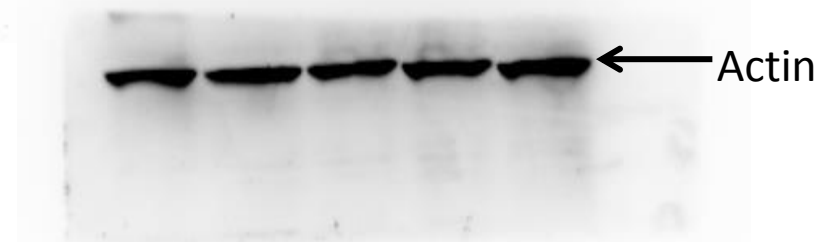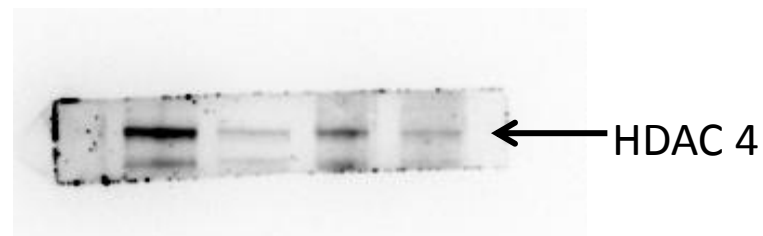

|                 |   |     |   |     |     |
|-----------------|---|-----|---|-----|-----|
| DMSO            | + | -   | - | -   | -   |
| PEITC( $\mu$ M) | - | 2.5 | 5 | 1   | -   |
| 5 AZA( $\mu$ M) | - | -   | - | 2.5 | 2.5 |

|                 |   |   |     |     |
|-----------------|---|---|-----|-----|
| DMSO            | + | - | -   | -   |
| PEITC( $\mu$ M) | - | 5 | 2.5 | -   |
| 5 AZA( $\mu$ M) | - | - | -   | 2.5 |

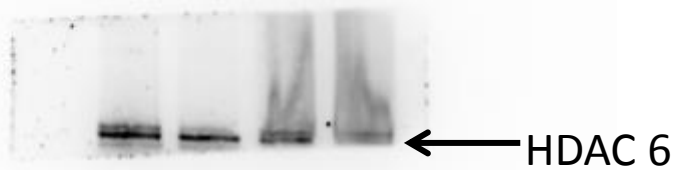

|                 |   |     |   |     |
|-----------------|---|-----|---|-----|
| DMSO            | + | -   | - | -   |
| PEITC( $\mu$ M) | - | 2.5 | 5 | -   |
| 5 AZA( $\mu$ M) | - | -   | - | 2.5 |

Fig 4B. Original blots

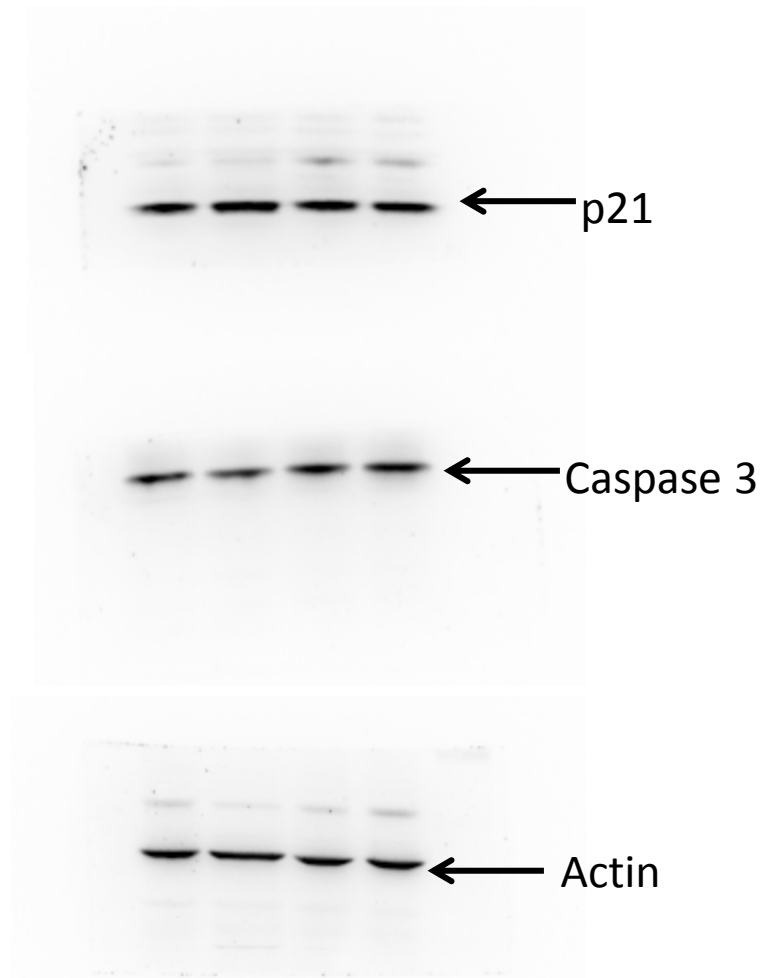

|           |   |     |   |     |
|-----------|---|-----|---|-----|
| DMSO      | + | -   | - | -   |
| PEITC(μM) | - | 2.5 | 5 | -   |
| 5 AZA(μM) | - | -   | - | 2.5 |
